# Supplementary material for: Contribution of trans regulatory eQTL to cryptic genetic variation in C. elegans
Source: PubMed Central journal article supplement (PMC5492678; doi:10.1186/s12864-017-3899-8), 2017-06-29
Supplement: 12864_2017_3899_MOESM2_ESM.pdf [file 12864_2017_3899_MOESM2_ESM.pdf]

**I**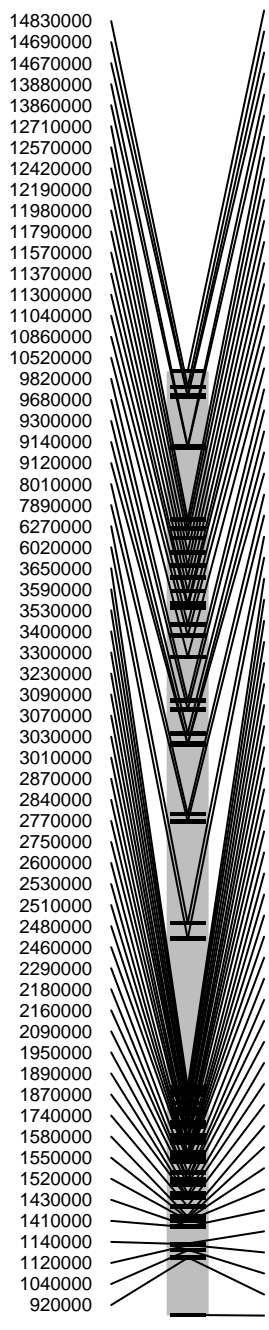

15072423  
14820000  
14680000  
14670000  
14660000  
13880000  
13870000  
13860000  
12710000  
12570000  
12420000  
12190000  
11980000  
11790000  
11570000  
11370000  
11300000  
11040000  
10860000  
10520000  
9820000  
9680000  
9300000  
9140000  
9120000  
8010000  
7890000  
6270000  
6020000  
3650000  
3590000  
3530000  
3400000  
3300000  
3230000  
3090000  
3070000  
3030000  
3010000  
2870000  
2840000  
2770000  
2750000  
2600000  
2530000  
2510000  
2480000  
2460000  
2290000  
2180000  
2160000  
2090000  
1950000  
1890000  
1870000  
1740000  
1580000  
1550000  
1520000  
1430000  
1410000  
1140000  
1120000  
1040000  
920000

14360000  
14170000  
13910000  
13890000  
13730000  
13490000  
13410000  
13390000  
13370000  
13350000  
13180000  
13160000  
13070000  
13040000  
13000000  
12980000  
12600000  
12580000  
12340000  
12280000  
12240000  
12220000  
12200000  
12110000  
12000000  
11980000  
11930000  
11820000  
11800000  
11000000  
8730000  
7940000  
5650000  
5580000  
5400000  
5020000  
4560000  
3880000  
3580000  
3480000  
3280000  
3240000  
2870000  
2840000  
2770000  
2640000  
2620000  
2530000  
2470000  
2210000  
2200000  
1670000  
1300000  
690000  
10000

**II**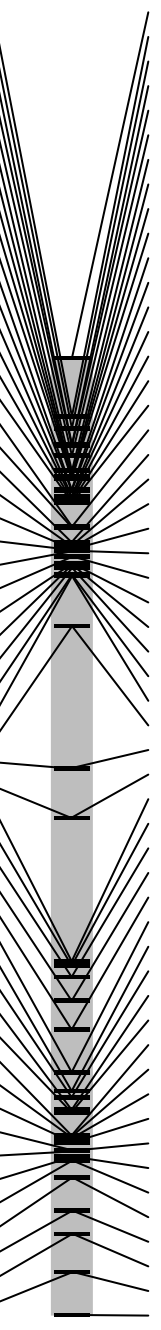

15279345  
14350000  
14160000  
13900000  
13880000  
13720000  
13480000  
13400000  
13380000  
13360000  
13190000  
13170000  
13080000  
13060000  
13030000  
12990000  
12970000  
12590000  
12350000  
12290000  
12250000  
12230000  
12210000  
12120000  
12010000  
11980000  
11940000  
11830000  
11810000  
11010000  
8740000  
7950000  
5660000  
5590000  
5410000  
5030000  
4570000  
3890000  
3590000  
3490000  
3290000  
3250000  
2880000  
2830000  
2760000  
2630000  
2540000  
2480000  
2210000  
1680000  
1310000  
700000  
10000

**III**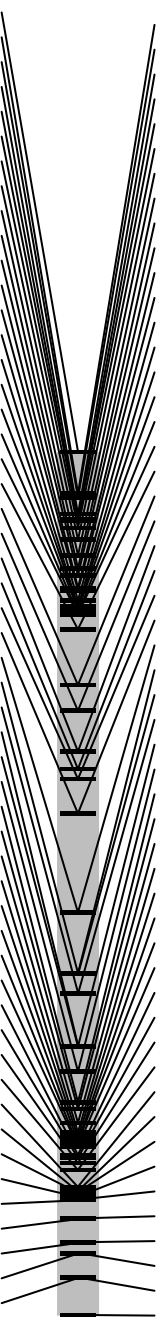

13783700  
13120000  
13050000  
12790000  
12700000  
12680000  
12570000  
12380000  
12130000  
11920000  
11810000  
11610000  
11570000  
11410000  
11310000  
11290000  
11260000  
11180000  
10950000  
10060000  
9650000  
9000000  
8720000  
8560000  
8010000  
6430000  
5460000  
5150000  
4310000  
4290000  
3890000  
3400000  
3290000  
3070000  
2920000  
2840000  
2770000  
2710000  
2690000  
2560000  
2510000  
2430000  
2320000  
2050000  
1980000  
1960000  
1890000  
1840000  
1540000  
1160000  
990000  
600000

**IV**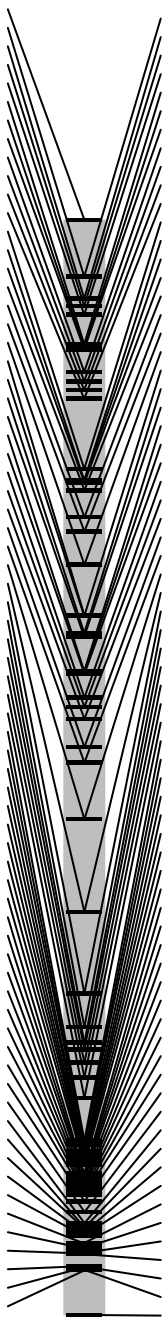

17493793  
16580000  
16230000  
16110000  
15970000  
15500000  
15440000  
15420000  
15060000  
14910000  
14780000  
14630000  
13510000  
13330000  
13300000  
13180000  
12750000  
12520000  
11990000  
11320000  
11300000  
11180000  
11160000  
10890000  
10830000  
10280000  
10250000  
9870000  
9720000  
9530000  
9080000  
8830000  
7930000  
6450000  
5150000  
4610000  
4360000  
4250000  
4040000  
3810000  
3480000  
2800000  
2750000  
3900000  
3410000  
3300000  
3080000  
2930000  
2850000  
2780000  
2760000  
2700000  
2570000  
2520000  
2440000  
2400000  
2260000  
2220000  
2200000  
2130000  
2080000  
2050000  
2000000  
1970000  
1930000  
1830000  
1660000  
1480000  
1410000  
1400000  
1390000  
1320000  
1280000  
1160000  
1080000  
1000000  
980000  
790000  
770000  
720000

**V**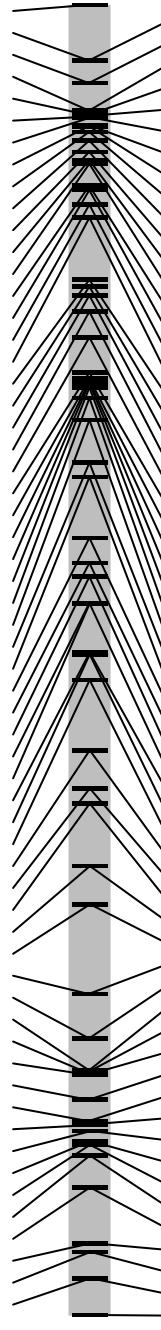

20924149  
16590000  
16240000  
16120000  
15980000  
15510000  
15450000  
15430000  
15070000  
14920000  
14780000  
14640000  
13520000  
13340000  
13320000  
13290000  
13170000  
18040000  
17970000  
17740000  
17730000  
17530000  
16540000  
16430000  
16290000  
16030000  
15620000  
15060000  
14960000  
14920000  
14890000  
14820000  
14650000  
14300000  
13620000  
13390000  
12420000  
12020000  
11800000  
11380000  
11360000  
10580000  
10550000  
10140000  
9020000  
8420000  
8180000  
8170000  
7170000  
6560000  
5130000  
4420000  
3910000  
3860000  
3840000  
3440000  
3100000  
3040000  
2940000  
2780000  
2720000  
2550000  
2040000  
1990000  
1960000  
1920000  
1820000  
1650000  
1470000  
1400000  
1330000  
1280000  
1160000  
1080000  
1000000  
980000  
880000  
800000  
730000  
10000

20040000  
19680000  
19240000  
19170000  
19150000  
19130000  
19000000  
18980000  
18900000  
18750000  
18570000  
18440000  
18380000  
18030000  
17960000  
17730000  
17520000  
17300000  
17270000  
17200000  
16500000  
16280000  
16020000  
15610000  
15050000  
14950000  
14910000  
14880000  
14810000  
14640000  
14290000  
13610000  
13380000  
12410000  
12010000  
11790000  
11370000  
10590000  
10560000  
10150000  
9030000  
8420000  
8180000  
7180000  
6570000  
5140000  
4430000  
3920000  
3900000  
3850000  
3450000  
3110000  
3050000  
2950000  
2790000  
2730000  
2560000  
2050000  
1160000  
1020000  
600000  
10000

**X**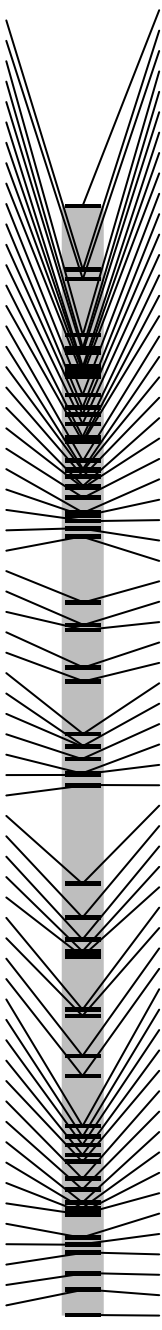

17718866  
16690000  
16540000  
15650000  
15440000  
15370000  
15140000  
15080000  
15000000  
14700000  
14500000  
14390000  
14240000  
14030000  
13960000  
13940000  
13640000  
13510000  
13480000  
13390000  
13240000  
13210000  
13050000  
12810000  
12760000  
12680000  
12560000  
12430000  
11380000  
11020000  
10940000  
10340000  
9280000  
9090000  
8890000  
8660000  
8640000  
8470000  
6900000  
6360000  
6010000  
5820000  
5740000  
4890000  
4790000  
4150000  
3830000  
3030000  
2860000  
2730000  
2570000  
2460000  
2190000  
2020000  
1810000  
1720000  
1650000  
1620000  
1250000  
1140000  
1010000  
680000  
420000  
10000
